# Supplementary material for: First Autochthonous Report on Cattle Babesia naoakii in Central Java, Indonesia, and Identification of Haemaphysalis bispinosa Ticks in the Investigated Area
Source: MDPI journal article supplement (doi:10.3390/pathogens12010059), 2022-12-29
Supplement: s1 [file s1]

## Supplementary materials

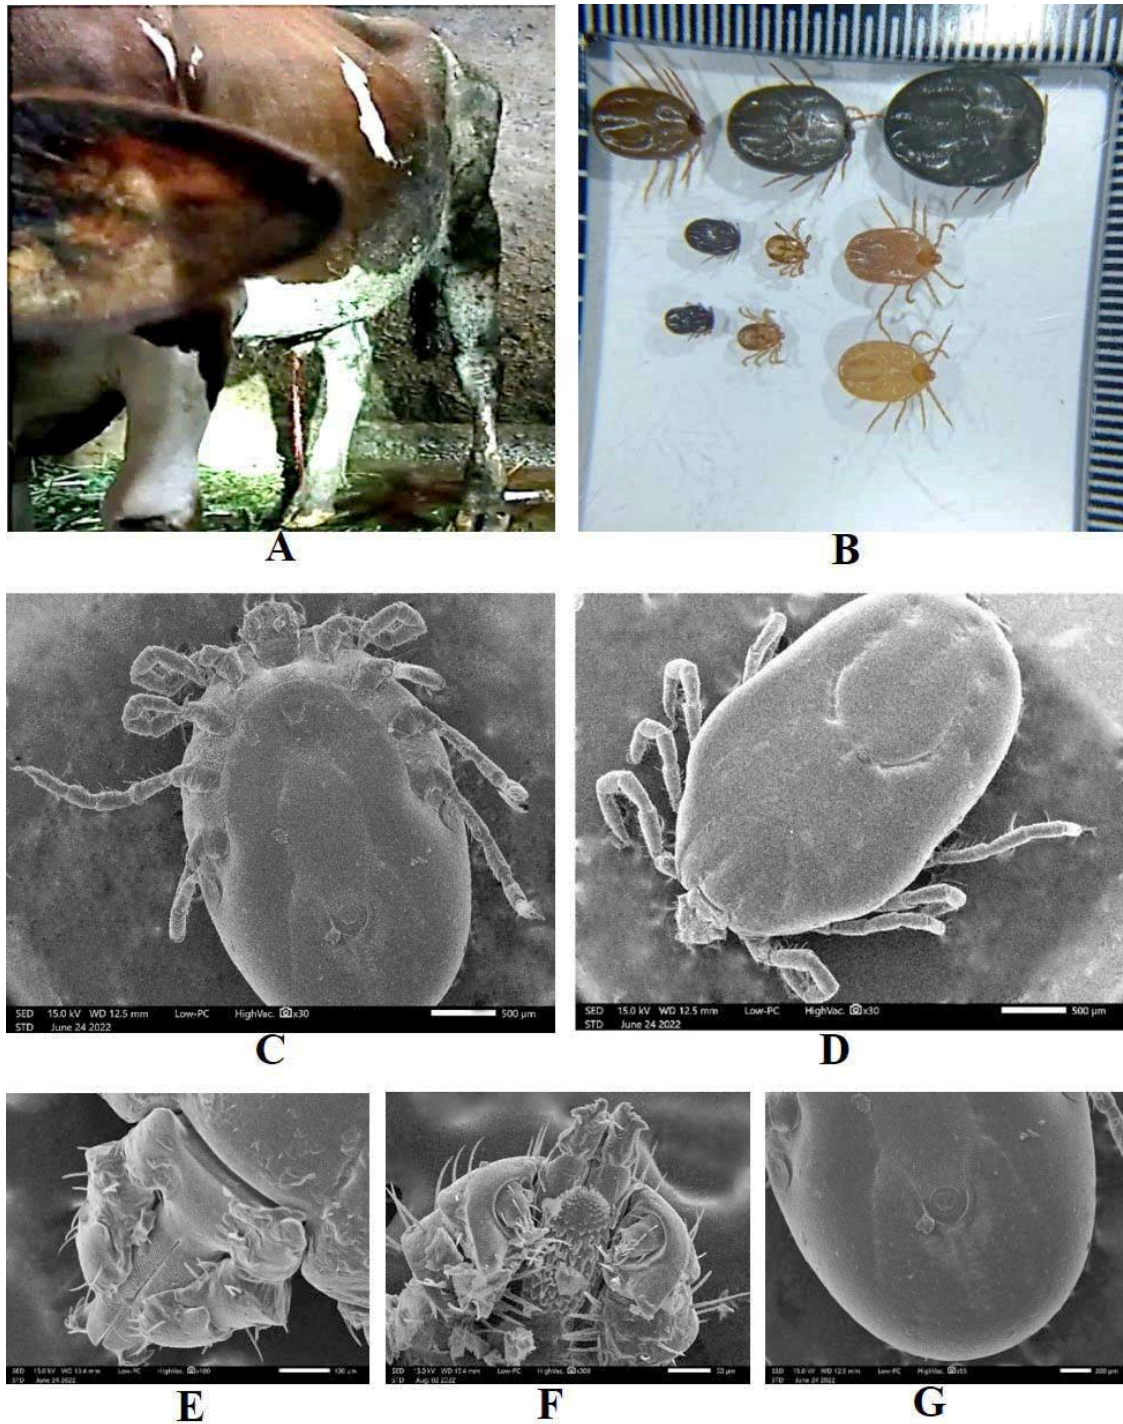

**Figure 1.** Clinical signs associated with bovine babesiosis in Boyolali, Central Java, and ticks randomly found during blood collection. A Holstein-Friesian calf with hematuria (hemoglobinuria) (A). *H. bispinosa* in various stages (B). Scanning electron microscopy of a tick, dorsal view (C), ventral view (D), gnathostome (E) and hypostome (F), ventral posterior view (G)
